# Supplementary material
Source: HighWire-hosted journal article supplement (https://bmjopenquality.bmj.com/content/12/2/e002211)
Supplement: inline-supplementary-material-2 [file inline-supplementary-material-2.pdf]

**Supplemental Table 1.** Questionnaire probing on current BPMH and MedRec practices of participants in the environmental scan

| Category                                | Questions                                                                                                                                                                |
|-----------------------------------------|--------------------------------------------------------------------------------------------------------------------------------------------------------------------------|
| <b>General Questions</b>                | Is there a policy and/or procedure in place for BPMH/ medication reconciliation process in the ambulatory setting at the institutional level?                            |
|                                         | Are you aware of any previous attempts to implement a process for medication reconciliation/ BPMH in your institution or in individual clinic in the ambulatory setting? |
| <b>Process</b>                          | When is the initial BPMH performed?                                                                                                                                      |
|                                         | When is medication reconciliation performed?                                                                                                                             |
|                                         | Where is BPMH/ medication reconciliation performed?                                                                                                                      |
|                                         | Who gathers data for it?                                                                                                                                                 |
|                                         | Who are the target patients that it?                                                                                                                                     |
| <b>Data Sources and Documentation</b>   | How is the data gathered?                                                                                                                                                |
|                                         | Where is the data documented?                                                                                                                                            |
|                                         | Is there a standardized documentation template?                                                                                                                          |
| <b>Provider Training</b>                | Is there any training provided by the institution for personnel expected to conduct Medication Reconciliation?                                                           |
| <b>Process and Outcomes Measurement</b> | Is there an individualized audit-and-feedback system for Medication Reconciliation performance?                                                                          |
|                                         | Are process or outcome measures evaluated?                                                                                                                               |
| <b>Role of Patients</b>                 | Are patients made aware of the importance of Medication Reconciliation and its process, through education by the staff/clinic?                                           |
|                                         | What kind of educational tools are available for patients to make them aware of the importance of Medication Reconciliation?                                             |
|                                         | Are patients reminded to bring in all of their current medication vials or most up-to-date medication lists to their clinic visits?                                      |
|                                         | Do patients get a paper copy of their reconciled medication list?                                                                                                        |

|                                                    |                                                                                                                    |
|----------------------------------------------------|--------------------------------------------------------------------------------------------------------------------|
|                                                    | Do patients get access to their reconciled medication list on an online portal?                                    |
| <b>Barriers and Facilitators to Implementation</b> | Can you share your challenges with implementing or sustaining Medication Reconciliation in the ambulatory setting? |
|                                                    | Can you share any facilitators for implementing or sustaining Medication Reconciliation in the ambulatory setting? |
