# Supplementary material
Source: HighWire-hosted journal article supplement (https://bmjopenquality.bmj.com/content/12/2/e002211)

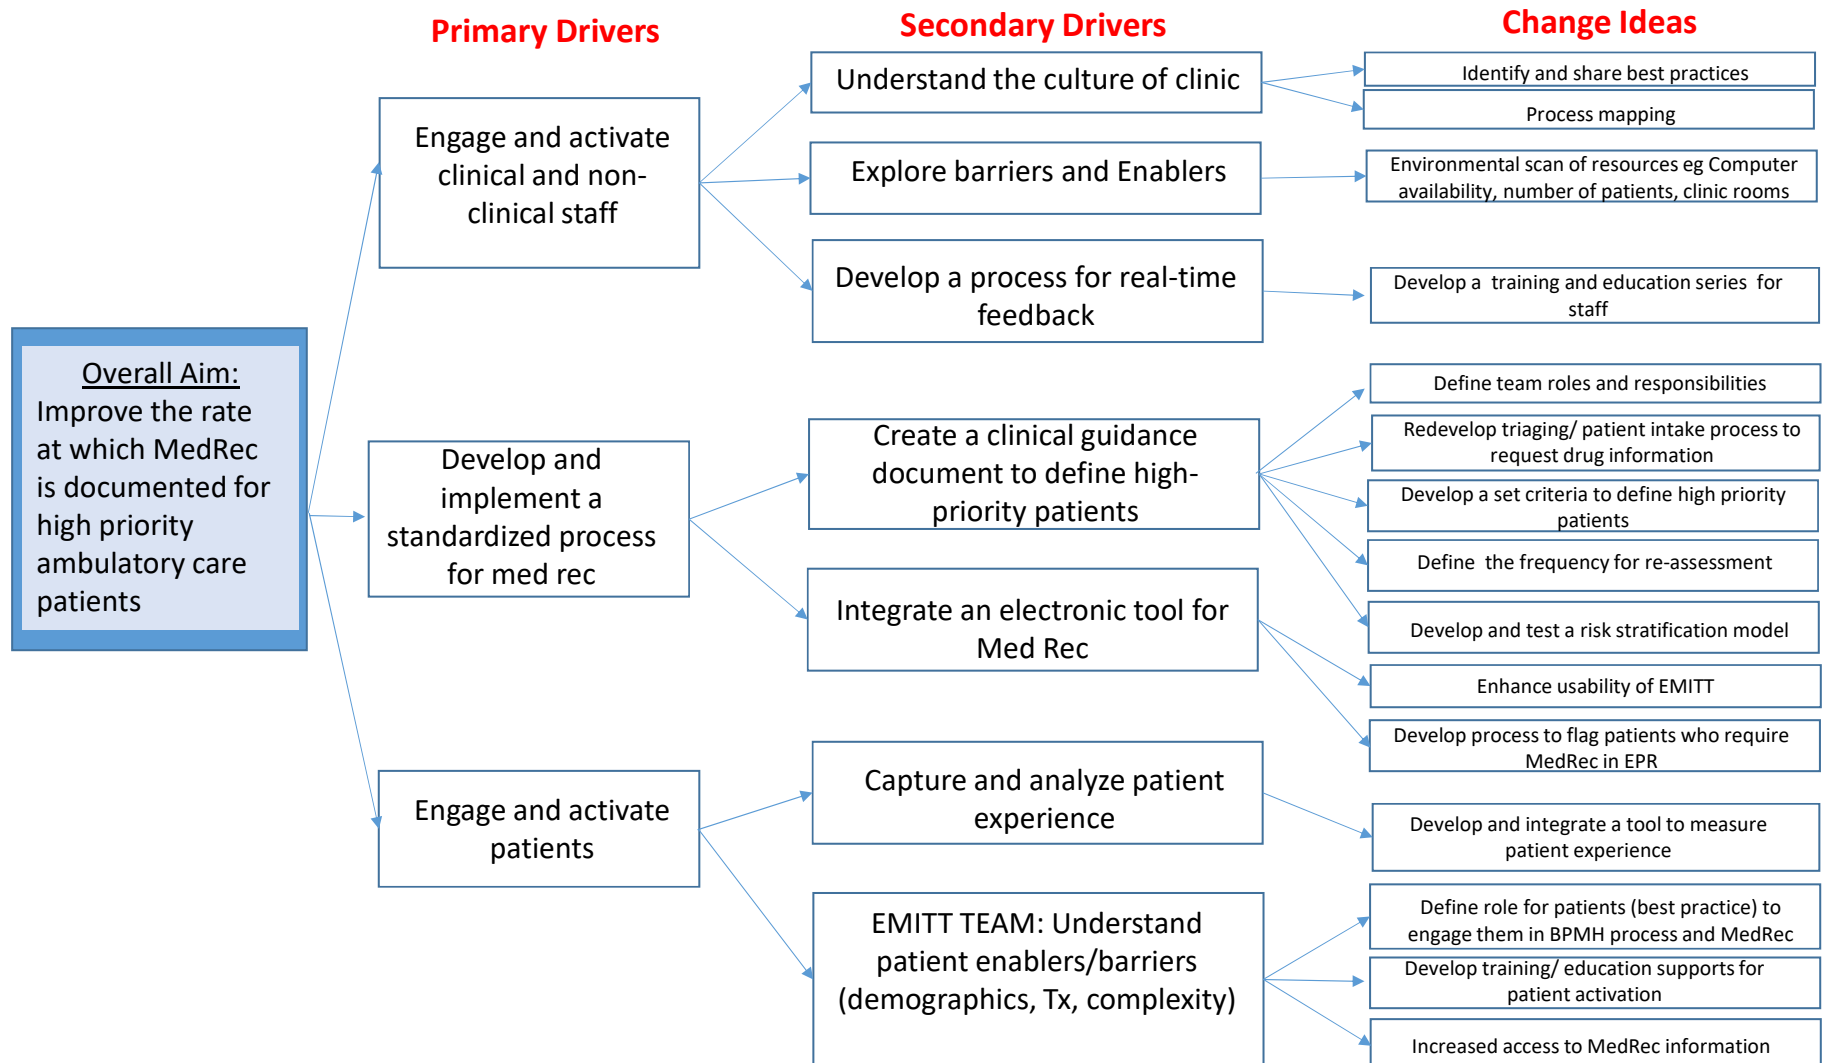

Supplement: inline-supplementary-material-1 [file inline-supplementary-material-1.pdf]
